# Supplementary material
Source: Springer Nature journal article supplement (https://www.springermedizin.de/resource/supplementary/12992_2011_169_MOESM2_ESM.pdf/9616642)

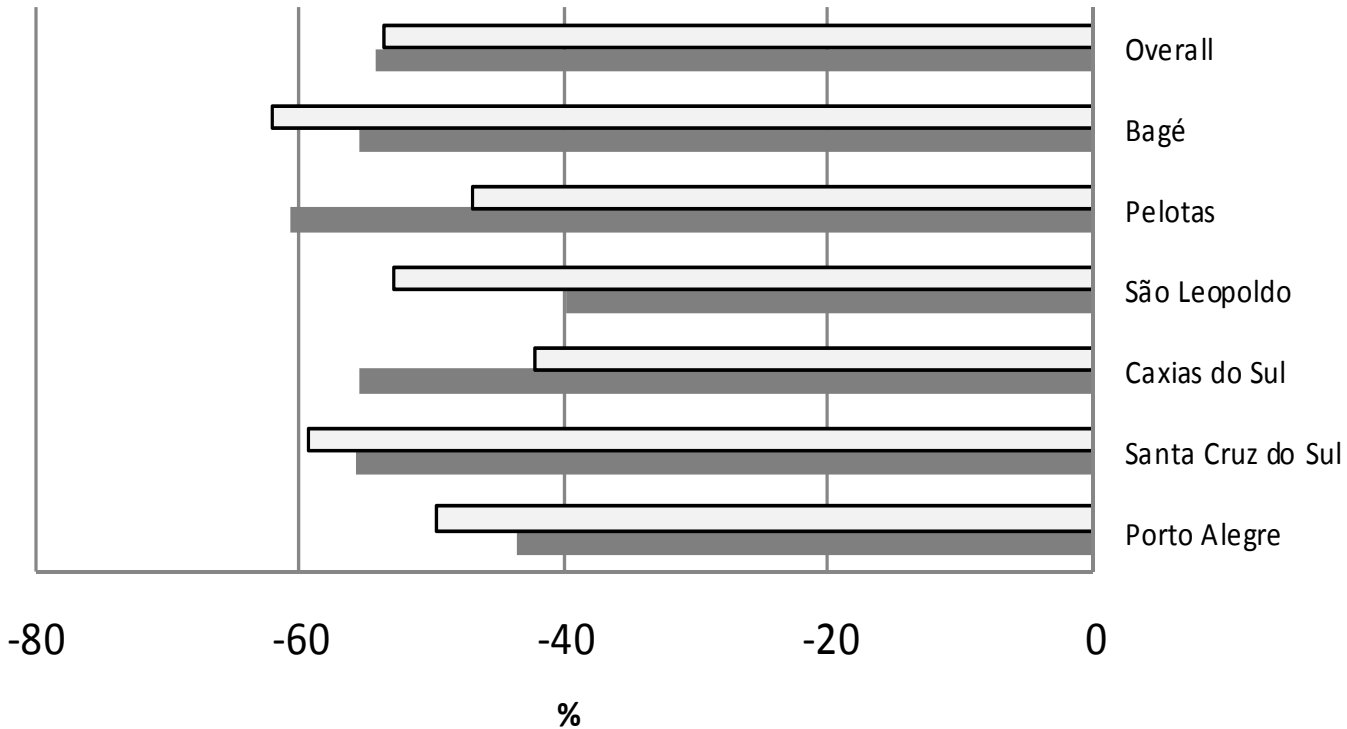

□ Similar ■ Generic

Supplement: MOESM2 [file 9616642]
